# Supplementary material
Source: PubMed Central journal article supplement (PMC7738215)
Supplement: NIHMS1035386-supplement-Supplemental_Table_1.pdf [file NIHMS1035386-supplement-Supplemental_Table_1.pdf]

**Supplemental Table 1. Item text, scales of measurement, and scoring for each measure.**

| <b>MEASURE</b>                                                                                                                                                                         | <b>SCALE (SCORING)</b>                                                |
|----------------------------------------------------------------------------------------------------------------------------------------------------------------------------------------|-----------------------------------------------------------------------|
| <b>Days per month</b>                                                                                                                                                                  | Scored continuously                                                   |
| “In a typical month (i.e., 30 days), on how many days do you use e-cigarettes?”                                                                                                        | 0 – 30                                                                |
| <b>Sessions per day (SPD)</b>                                                                                                                                                          | Average of 7 items                                                    |
| “In a typical week please write the number of sessions you typically use your e-cigarette on each day” (each day of the week listed separately)                                        | Open-ended                                                            |
| <b>Sessions per month (SPM)</b>                                                                                                                                                        | Days per month X sessions per day                                     |
| <b>Penn State Electronic Cigarette Dependence Index (ECDI)</b>                                                                                                                         | Sum of item scores                                                    |
| Sessions per day (as calculated above)                                                                                                                                                 | 0-4 sessions (0), 5-9 (1), 10-14 (2), 15-19 (3), 20-29 (4), 30+ (5)   |
| On days that you can use your electronic cigarette freely, how soon after you wake up do you first use your electronic cigarette?                                                      | 121+ minutes (0), 61-120 (1), 31-60 (2), 16-30 (3), 6-15 (4), 0-5 (5) |
| Do you sometimes awaken at night to use your electronic cigarette?                                                                                                                     | No (0), Yes (1)                                                       |
| If yes, how many nights per week do you typically awaken to use your electronic cigarette?                                                                                             | 0-1 nights (0), 2-3 (1), 4+ (2)                                       |
| Do you use an electronic cigarette now because it is really hard to quit?                                                                                                              | No (0), Yes (1)                                                       |
| Do you ever have strong cravings to use an electronic cigarette?                                                                                                                       | No (0), Yes (1)                                                       |
| Over the past week, how strong have the urges to use an electronic cigarette been?                                                                                                     | None/slight (0), moderate/strong (1), very/extremely strong (2)       |
| Is it hard to keep from using an electronic cigarette in places where you are not supposed to?                                                                                         | No (0), Yes (1)                                                       |
| When you haven’t used an electronic cigarette for awhile or when you tried to stop using, did you feel more irritable because you couldn’t use an electronic cigarette?                | No (0), Yes (1)                                                       |
| When you haven’t used an electronic cigarette for awhile or when you tried to stop using, did you feel nervous, restless, or anxious because you couldn’t use an electronic cigarette? | No (0), Yes (1)                                                       |
| <b>EASI</b>                                                                                                                                                                            | Scored continuously                                                   |
| “On a scale of 0-100% (not addicted to extremely addicted), how addicted to e-cigarettes do you think you are?”                                                                        | 0-100%                                                                |
| <b>Heaviness of Vaping Index (HVI)</b>                                                                                                                                                 | Sum of item scores                                                    |
| Sessions per day                                                                                                                                                                       | 0-4 sessions (0), 5-9 (1), 10-14 (2), 15-19 (3), 20-29 (4), 30+ (5)   |
| On days that you can use your electronic cigarette freely, how soon after you wake up do you first use your electronic cigarette?                                                      | 121+ minutes (0), 61-120 (1), 31-60 (2), 16-30 (3), 6-15 (4), 0-5 (5) |
